# Supplementary material for: Integrating Personality, Psychological Skills and Psychophysiological Performance Factors in Athlete Profiling: Evidence from Team and Individual Sports
Source: Research Square preprint supplement (doi:10.21203/rs.3.rs-8224965/v1), 2025-12-10
Supplement: Supplementary file 1 [file 5ebc39d3b021ced0709103ca.xlsx]

## Sheet: Sheet1
Table S1. Pearson Correlations Among Demographics, Personality, Psychological, and Psychophysiological Variables
No.	Variable	1	2	3	4	5	6	7	8	9	10	11	12	13	14	15	16	17	18	19	20	21	22	23	24	25	26	27
1	Age	1
2	Gender	-,324**	1
3	Sport type (Team vs individual)	,250**	-,345**	1
4	Training load (trainings per week)	-,234**	,170**	0.056	1
5	Experience (years)	,304**	-0.009	-,182**	-0.094	1
6	Neuroticism	0.072	-,319**	0.074	-,126*	0.006	1
7	Conscientiousness	0.045	-0.011	-0.088	-0.022	0.068	-0.088	1
8	Extroversion	-0.07	-0.004	-0.037	0.007	-0.054	-,214**	0.063	1
9	Adventurism	-0.099	0.006	,200**	,139*	-0.083	-0.039	-,128*	,170**	1
10	Openness	0.076	-,120*	,159**	-0.087	-0.064	0.061	,125*	0.078	,165**	1
11	Modesty	,125*	-,158**	0.041	-,183**	0.056	0.043	-0.068	0.029	-0.058	0.092	1
12	Confidence	,152**	-,315**	0.105	-,154**	-0.085	,647**	-0.057	-,206**	0.024	0.08	-0.015	1
13	Motivation	-,351**	,348**	-,246**	,269**	-0.005	-,114*	,120*	,121*	,137*	-,201**	-,218**	-,152**	1
14	Team_emphases	-,195**	0.076	-,226**	-,190**	0.097	-0.093	,142*	,257**	0.066	0.045	-0.025	-,118*	,197**	1
15	Visualization	-0.066	0.087	0.092	0.085	0.011	0.047	-0.01	-0.053	0.048	0.022	0.055	0.106	,249**	0.029	1
16	Stress tolerance	0.088	-,181**	0.067	-0.087	-0.024	0.037	0.058	0.057	-0.044	0.046	0.112	0.052	-,146*	-0.058	-0.017	1
17	Exactitude	0.03	-0.044	0.08	0.072	,124*	-0.011	-0.081	0.087	0.074	-0.043	-0.021	0.024	0.007	-0.031	-0.05	0.046	1
18	Decisiviness	-,172**	0.029	0.014	,134*	-0.073	-0.039	-0.107	0.06	0.073	-0.025	-0.04	-0.091	0.065	0.007	-0.067	0.07	0.084	1
19	Impulsivity	,137*	-0.051	0.064	-0.016	,122*	0.032	-0.027	0.033	0.021	-0.043	-0.008	,122*	0.002	-0.051	0.009	-0.057	,739**	-,486**	1
20	Performance	0.026	0.045	-0.008	0.057	-0.032	-0.018	-0.023	-0.002	0.095	0.026	0.056	-0.046	-0.045	-0.036	-0.022	,429**	0.088	,156**	-0.027	1
21	Aspiration	-,255**	0.089	-,124*	0.047	-0.071	-0.026	-0.044	0.09	0.018	0.088	-,188**	0.028	0.07	-0.022	-0.039	-0.083	-0.033	0.059	-0.051	-,132*	1
22	Frustation tolerance	0.089	-0.102	-0.048	-,127*	0.048	0.005	,195**	-0.001	-0.089	-0.024	0.023	0.051	-0.019	0.074	-0.031	0.073	0.038	-0.098	0.071	-,344**	,164**	1
23	Target discrepance	-0.027	,115*	-0.018	0.069	-0.044	0.087	0.032	-0.058	-0.002	-0.072	0.025	-0.052	,142*	-0.067	0.07	-0.06	0.017	0.081	-0.025	0.079	-,307**	-,225**	1
24	Reaction speed	-0.068	0.106	-0.05	,174**	-0.071	-0.061	-0.009	-0.006	0.093	0.093	0.005	-0.06	0.004	-0.042	0.012	,159**	0.014	-0.044	0.029	,176**	0.047	-0.043	-0.039	1
25	Motor speed	-,144*	,324**	-0.054	,198**	-0.092	-0.103	-0.041	-0.034	,124*	0.054	-0.015	-0.019	,149**	0.049	0.076	,191**	-0.034	,120*	-0.108	,203**	,120*	-0.067	0.036	,389**	1
26	Choice reaction speed	-,138*	,141*	-,139*	,173**	-0.042	-0.031	0.052	-0.032	-0.006	0.017	0.054	-0.061	,132*	-0.014	-0.061	,257**	-0.049	0.059	-0.105	,250**	-0.099	-0.054	0.034	,577**	,397**	1
27	Choice motor speed	-,203**	,367**	-0.109	,196**	-0.105	-0.102	-0.071	-0.051	0.08	0.03	-0.015	-0.04	,185**	0.058	,123*	,181**	-0.092	0.042	-0.081	,227**	0.081	-,115*	0.038	,307**	,751**	,357**	1
28	Level	,139*	-0.05	-0.056	-,486**	-0.077	,137*	0.063	-0.052	-,191**	0.074	0.034	,125*	-,265**	-0.103	-,137*	-0.015	-,114*	-0.079	-0.038	-0.09	0.035	,152**	-0.039	-,135*	-,220**	-,137*	-,216**	1
	** Correlation is significant at the 0.01 level (2-tailed).
	* Correlation is significant at the 0.05 level (2-tailed).
