# Supplementary material for: Integrating Personality, Psychological Skills and Psychophysiological Performance Factors in Athlete Profiling: Evidence from Team and Individual Sports
Source: Research Square preprint supplement (doi:10.21203/rs.3.rs-8224965/v1), 2025-12-10
Supplement: Supplementary file 2 [file 70a28c64e977c9f2391c2b5a.docx]

**Appendix A.** **Supplementary Tables**

**Table S1.** Descriptive Statistics, Normality, and Internal Consistency of Personality, Psychological Skills, and Psychophysiological Performance Variables (n = 304)

| **Factor** | **Descriptive scores** | | | | **Cronbach’s alpha**  **(α)** |
| --- | --- | --- | --- | --- | --- |
| *M* | *SD* | *Sk* | *Ku* |
| *Personality factors* | | | | | |
| F1: Neuroticism | 28.12 | 4.43 | 0.34 | −0.02 | 0.53 |
| F2: Conscientiousness | 33.39 | 6.48 | −0.28 | −0.32 | 0.79 |
| F3: Extraversion | 33.28 | 6.49 | 0.00 | 0.19 | 0.69 |
| F4: Adventurism | 34.48 | 8.37 | −0.40 | −0.12 | 0.64 |
| F5: Agreeableness | 30.83 | 4.34 | −0.41 | 0.32 | 0.38 |
| F6: Openness | 29.47 | 5.49 | 0.04 | 0.03 | 0.68 |
| F7: Modesty | 30.77 | 8.85 | 0.01 | −0.29 | 0.61 |
| *Psychological skills factors* | | | | | |
| F8: Self−confidence | 19.12 | 6.32 | 0.11 | −0.86 | 0.68 |
| F9: Motivation | 14.91 | 3.63 | −0.59 | −0.44 | 0.75 |
| F10: Team emphasis | 12.99 | 2.22 | −1.45 | 2.09 | 0.72 |
| F11: Visualization | 9.9 | 2.45 | −0.28 | 0.22 | 0.43 |
| *Psychophysiological performance factors* | | | | | |
| F12: Stress tolerance | 54.32 | 7.61 | −0.17 | −0.23 | − |
| F13: Exactitude | 49.61 | 7.06 | −0.08 | −0.36 | − |
| F14: Decisiveness | 62.11 | 8.47 | −1.18 | 0.76 | − |
| F15: Impulsivity | 41.81 | 9.36 | 0.43 | 0.59 | − |
| F16: Performance | 61.55 | 6.13 | 0.18 | 0.08 | − |
| F17: Aspiration | 56.58 | 7.62 | −0.87 | 2.02 | − |
| F18: Frustration tolerance | 44.92 | 5.98 | 0.06 | 0.03 | − |
| F19: Target discrepancy | 49.65 | 8.91 | −0.35 | 0.70 | − |
| F20: Reaction speed | 61.36 | 8.99 | 0.21 | −0.23 | − |
| F21: Motor speed | 62.38 | 8.69 | 0.5 | −0.23 | − |
| F22: Choice reaction speed | 67.02 | 9.78 | −0.03 | −1.02 | − |
| F23: Choice motor speed | 65.65 | 8.41 | 0.11 | −0.57 | − |

*Note.* M: arithmetic mean; SD: standard deviation; Sk: skewness; Ku: kurtosis. Cronbach’s α was calculated only for multi−item self−report scales (personality and psychological skills factors). Psychophysiological performance factors represent standardized test scores (T−values) obtained from the VTS.

**Tabel S2.** Descriptive Statistics and Standardized z-Scores for the Four Athlete Clusters

| **Factor** | **Cluster 1**  **(n=102)** | | **Cluster 2**  **(n=75)** | | **Cluster 3**  **(n=85)** | | **Cluster 4**  **(n=42)** | | **p** |
| --- | --- | --- | --- | --- | --- | --- | --- | --- | --- |
| *M (SD)* | *Z* | *M*  *(SD)* | *Z* | *M*  *(SD)* | *Z* | *M*  *(SD)* | *Z* |
| *Personality factors* |  |  |  |  |  |  |  |  |  |
| F1: Neuroticism | 28.03 (4.55) | 0.03 | 28.09 (4.3) | 0.02 | 28.58 (4.36) | 0.05 | 27.47 (4.38) | −0.21 | 0.53 |
| F2: Conscientiousness | 33.73 (6.62) | 0.00 | 33.07 (6.2) | −0.06 | 33.21 (7.08) | 0.01 | 33.5 (5.06) | 0.08 | 0.91 |
| F3: Extraversion | 33.02 (6.51) | −0.03 | 34.51 (6.89) | 0.06 | 33  (6.46) | −0.03 | 32.3 (5.3) | 0.04 | 0.92 |
| F4: Adventurism | 34.53 (8.06) | 0.01 | 36.3 (9.68) | −0.07 | 32.74 (8.27) | −0.02 | 34.64 (5.44) | 0.14 | 0.74 |
| F5: Openness | 29.39 (5.41) | −0.09 | 21.11 (5.16) | 0.25 | 29.73 (5.87) | −0.09 | 29.76 (5.34) | −0.07 | 0.88 |
| F6: Modesty | 31.44 (7.9) | −0.02 | 30.45 (8.3) | 0.14 | 30.08 (10.22) | −0.01 | 31.11 (8.72) | −0.17 | 0.74 |
| *Psychological skill factors* | | | | | | | | | |
| F7: Confidence | 18.6 (6.47) | −0.04 | 19.88 (5.97) | 0.22 | 19.21 (6.18) | −0.02 | 18.83 (6.59) | −0.25 | 0.6 |
| F8: Motivation | 15.4 (3.36) | 0.2 | 14.81 (3.66) | −0.34 | 14.31 (3.68) | −0.24 | 15.12 (3.87) | 0.6 | 0.22 |
| F9: Team emphases | 13.05 (2.1) | 0.09 | 12.75 (2.45) | 0.31 | 13.21 (2.15) | −0.48 | 12.86 (2.14) | 0.21 | 0.58 |
| F10: Visualization | 10.03 (2.48) | 0.2 | 9.8 (2.49) | −0.08 | 9.68 (2.24) | −0.09 | 10.19 (2.64) | −0.16 | 0.65 |
| *Psychophysiological performance* *factors* | | | | | | | | | |
| F11: Stress tolerance | 56.56 (6.64) | 0.66 | 52.07 (7.02) | 0.21 | 51.71 (7.16) | 0.17 | 58.19 (8.26) | 0.82 | < 0.001 |
| F12: Exactitude | 47.76 (5.16) | −0.22 | 55.53 (6.14) | 0.55 | 45.78 (6.39) | −0.42 | 51.24 (6.42) | 0.12 | < 0.001 |
| F13: Decisiveness | 67.22 (3.78) | 1.72 | 57.63 (8.54) | 0.76 | 63.56 (6.78) | 1.36 | 54.76 (10.2) | 0.48 | < 0.001 |
| F14: Impulsivity | 36.25 (5.97) | −1.38 | 51.67 (7.14) | 0.17 | 36.52 (5.92) | −1.35 | 48.4 (5.86) | −0.16 | < 0.001 |
| F15: Performance | 64.26 (6.09) | 1.43 | 59.8 (6.2) | 0.98 | 58.82 (4.91) | 0.88 | 63.6 (4.55) | 1.36 | < 0.001 |
| F16: Aspiration | 55.72 (7.83) | 0.57 | 54.36 (9.02) | 0.44 | 58.82 (5.89) | 0.89 | 58.02 (5.58) | 0.8 | < 0.001 |
| F17: Frustration tolerance | 43.14 (5.74) | −0.69 | 44.71 (5.87) | −0.53 | 46.62 (6.33) | −0.34 | 46.17 (4.47) | −0.38 | < 0.001 |
| F18: Target discrepancy | 52.97 (7.23) | 0.3 | 51.64 (8.82) | 0.16 | 46.22 (86.33) | −0.38 | 45 (8.65) | −0.5 | < 0.001 |
| F19: Reaction speed | 64.45 (6.97) | 1.45 | 58.12 (6.5) | 0.81 | 55.02 (6.79) | 0.5 | 72.45 (7.01) | 2.25 | < 0.001 |
| F20: Motor speed | 67.15 (7.7) | 1.71 | 57.35 (5.52) | 0.73 | 58.42 (7.81) | 0.84 | 67.76 (7.85) | 1.77 | < 0.001 |
| F21: Choice reaction speed | 72.58 (7.86) | 2.26 | 62.21 (7.92) | 1.22 | 59.6 (6.06) | 0.96 | 67.67 (7.85) | 2.71 | < 0.001 |
| F22: Choice motor speed | 70.84 (7.18) | 2.08 | 60.93 (6.51) | 1.09 | 61.33 (6.91) | 1.13 | 77.14 (4.91) | 2.02 | < 0.001 |

*Note*. Tested by ANOVA, followed by post−hoc Tukey’s HSD, *p* < 0.05. Clusters are statistically different. K−cluster analysis algorithm successfully converged to a stable solution after 9 iterations. Z−scores were computed separately within each cluster.
