# Supplementary material for: Integrating Personality, Psychological Skills and Psychophysiological Performance Factors in Athlete Profiling: Evidence from Team and Individual Sports
Source: Research Square preprint supplement (doi:10.21203/rs.3.rs-8224965/v1), 2025-12-10
Supplement: Supplementary file 3 [file eb820b7631a6e28491762087.xlsx]

## Sheet: Q1_Profile_Reality_Raw
Expert_ID	Profile	Stance	Original_Quote_EN	Thematic_Code
1	1	yes	Profile 1 matches high-level players and team leaders; emotionally balanced, self-regulated, focused under pressure.	leadership_stability
1	2	yes	Disciplined, conscientious, well-trainable; strong responsibility; sometimes struggle to adapt to unexpected situations.	precision_overcontrol
1	3	yes	Common among younger athletes; emotional fluctuations and quick frustration after errors.	emotional_reactivity
1	4	yes	Energetic, instinctive; speed is a strength; impulsivity may cause emotional outbursts.	reactive_speed
2	1	yes	Experienced, elite athletes in team and individual sports.	leadership_stability
2	2	yes	Experienced amateurs / national level.	precision_overcontrol
2	3	yes	Youth or early adult transition.	emotional_reactivity
2	4	yes	Pre-elite/elite in growth stage.	reactive_speed
3	1	yes	High emotional stability and focus; THE RESILIENT.	leadership_stability
3	2	yes	Self-regulating and strategic; THE STABLE.	precision_overcontrol
3	3	yes	THE SENSITIVE; recognised in practice.	emotional_reactivity
3	4	yes	Creative-reactive; needs explicit mention of emotional reactivity.	reactive_speed
4	1	partial	Cool-headed natural leader seen observationally.	leadership_stability
4	2	yes	Careful, logical; may decide late under stress.	precision_overcontrol
4	3	yes	Performance depends on momentary feelings; psychologically labile.	emotional_reactivity
4	4	partial	Instinctive, adaptive quick decision-makers.	reactive_speed
5	1	yes	High achievers; team drivers; prioritise sport; strong self-understanding.	leadership_stability
5	2	yes	Often individual sports; fear of mistakes; motivated.	precision_overcontrol
5	3	yes	Many such athletes; sometimes talented but low self-regulation.	emotional_reactivity
5	4	yes	Shine in decisive moments; dislike monotony.	reactive_speed
6	1	partial	Emotionally stable and composed; rarely meet them in practice.	leadership_stability
6	2	yes	High ambition; progress with work; motivated.	precision_overcontrol
6	3	partial	High, hard-to-control energy; work less effective.	emotional_reactivity
6	4	yes	Good psychophysiological fit for elite; fast effects.	reactive_speed
7	1	yes	Balanced, mature, consistent performers.	leadership_stability
7	2	yes	Analytical, perfectionist; control-seeking; fear of errors limits performance.	precision_overcontrol
7	3	yes	Emotionally volatile, impulsive; often in youth/transition.	emotional_reactivity
7	4	yes	Spontaneous, energetic; thrive under pace and pressure; need patience.	reactive_speed
8	1	no	These four profiles do not reflect real athlete types.	scepticism
8	2	no	Same stance.	scepticism
8	3	no	Same stance.	scepticism
8	4	no	Same stance.	scepticism
9	1	yes	Confident; future elite talents.	leadership_stability
9	2	yes	Hard workers who deliver when it all depends on them.	precision_overcontrol
9	3	yes	Accurate until errors; youth; emotion-driven variability.	emotional_reactivity
9	4	yes	Experienced top athletes; maintain/elevate performance in key moments.	reactive_speed

## Sheet: Q1_Profile_Summary
Profile	Yes_Count	Partial_Count	No_Count
1	6	2	1
2	8	0	1
3	7	1	1
4	7	1	1

## Sheet: Q2_Behaviour_Raw
Expert_ID	Profile	Original_Quote_EN	Condensed_Meaning	Thematic_Code
1	1	After errors they analyse and adapt quickly; keep calm and task-focused under stress.	Calm analysis and rapid adjustment under pressure	focus_under_pressure
1	2	Repeat drills until fully precise; control holds if plan works; unexpected events can unsettle.	Precision/control; struggles with unpredictability	routine_precision
1	3	After multiple errors may verbalise 'I can't', lose motivation; performance depends on mood.	Emotion-driven performance swings	emotional_volatility
1	4	Struggle with slow, precise execution; excel in fast episodes; may rush and err.	Prefers speed; impatience in monotony	quick_decisionmaking
2	1	Confident, inspire younger teammates; stable performance.	Leadership and stability	leadership_support
2	2	Diligent, compliant; cautious/avoidant; less effective under stress.	Cautious execution	cautious_decisions
2	3	Sensitive with reduced stress tolerance.	Low stress tolerance	low_stress_tolerance
2	4	High stress tolerance.	High stress tolerance	high_stress_tolerance
3	1	Calm and concentrated in competition; analyse rather than criticise after failures.	Calm analysis after errors	recovery_after_error
3	2	Checks equipment and routines; inner tension with errors, rarely outward.	Routine reliance; inner tension	routine_precision
3	3	Nervous, dependent on external stimuli/coach; emotional reactions to errors; may shut down.	Emotional dependence/reactivity	emotional_volatility
3	4	Dynamic, quick decisions; fight mode under stress; may fatigue quickly after intensive periods.	Fast, reactive; fatigue risk	quick_decisionmaking
4	1	Takes over late-game responsibility; composed; analyses failures for next time.	Responsible leadership; composed	leadership_support
4	2	Great in training, inconsistent in competition; delayed decisions under stress; overcontrolled.	Overcontrol and decision delay	overanalysis_delay
4	3	Unstable; chain of errors after first mistake; may think of quitting after failures.	Error spiral and withdrawal risk	loss_of_focus_after_errors
4	4	Excellent in fast decision sports; attentional slips; may become aggressive when frustrated.	Fast but attention lapses; reactive aggression	quick_decisionmaking
5	1	Workaholics; excel in competition; training routine may lower drive; learn from mistakes.	Competitive effectiveness; learns from errors	recovery_after_error
5	2	Training works; competitions hard to realise potential; indecision or freezing under stress.	Indecision under stress	overanalysis_delay
5	3	May love training but dislike competing.	Training–competition mismatch	motivation_swings
5	4	Value spontaneity and relationships; wave-like stress response; can mobilise maximally briefly.	Spontaneous; wave-like stress; short-burst peak	quick_decisionmaking
6	1	Team players; collaborative and goal-oriented.	Team orientation	team_orientation
6	2	More introverted; prefer individual training; public aspect hinders performance.	Introversion; public pressure sensitivity	cautious_decisions
6	3	Externalised reactions; less liked in teams due to this.	External regulation and reactions	emotional_volatility
6	4	Mobilise under stress; resilient until cumulative failures/trauma.	Mobilise under stress; cumulative risk	high_stress_tolerance
7	1	Maintain focus in intense situations; planful training; stabilising presence for team.	Focus and stabilising presence	focus_under_pressure
7	2	Overly cautious due to fear of errors; slow to recover; need calm feedback.	Fear-of-error caution; slow recovery	cautious_decisions
7	3	Mood-dependent engagement; emotional reactions; need structured self-regulation.	Mood-dependent performance	motivation_swings
7	4	Prefer short, intense tasks; monotony drains; rapid reactions; prolonged stress may trigger impulsivity.	Short-burst excellence; monotony aversion	aversion_monotony
9	1	Leaders who take initiative in decisive moments; set emotions aside to decide correctly.	Leadership under pressure	leadership_support
9	2	Very precise in trained elements; lower creative help for teammates in crucial moments.	Precision but low creativity in chaos	routine_precision
9	3	Youth; insufficient training volume for confidence; emotion-driven unpredictability.	Experience/volume deficit with emotional variability	emotional_volatility
9	4	Experienced athletes maintain or elevate performance in key moments; low unforced errors.	Clutch performance and precision	focus_under_pressure

## Sheet: Q2_Behaviour_Frequency
Thematic_Code	1	2	3	4	Total_mentions
emotional_volatility	0	0	4	0	4
quick_decisionmaking	0	0	0	4	4
cautious_decisions	0	3	0	0	3
focus_under_pressure	2	0	0	1	3
leadership_support	3	0	0	0	3
routine_precision	0	3	0	0	3
high_stress_tolerance	0	0	0	2	2
motivation_swings	0	0	2	0	2
overanalysis_delay	0	2	0	0	2
recovery_after_error	2	0	0	0	2
aversion_monotony	0	0	0	1	1
loss_of_focus_after_errors	0	0	1	0	1
low_stress_tolerance	0	0	1	0	1
team_orientation	1	0	0	0	1

## Sheet: Q2_Behaviour_Summary
Profile	Top_Behaviour_Themes
1	leadership_support (N=3); focus_under_pressure (N=2); recovery_after_error (N=2); team_orientation (N=1)
2	cautious_decisions (N=3); routine_precision (N=3); overanalysis_delay (N=2)
3	emotional_volatility (N=4); motivation_swings (N=2); loss_of_focus_after_errors (N=1); low_stress_tolerance (N=1)
4	quick_decisionmaking (N=4); high_stress_tolerance (N=2); focus_under_pressure (N=1); aversion_monotony (N=1)

## Sheet: Q3_Interventions_Raw
Expert_ID	Profile	Original_Quote_EN	Condensed_Meaning	Thematic_Code
1	1	Develop self-reflection and mindfulness to maintain long-term motivation; foster empathy and team communication.	Sustain motivation and leadership with reflective awareness and empathy	self_reflection
1	1	Foster empathy and communication, especially with younger or emotionally reactive teammates.	Leadership & prosocial communication	leadership_empathy
1	2	Train stress tolerance using breathing and concentration; use positive self-talk; simulate unexpected situations.	Physiological down-regulation, self-talk, exposure to unpredictability	relaxation_breathing
1	2	Simulate unpredictable situations (modified rules, time pressure).	Practice spontaneity/flexibility under uncertainty	unpredictability_training
1	3	Develop emotional self-regulation and mindfulness (box breathing, 3-second reset). Reduce fear of mistakes via reflection.	Emotion regulation protocols and error-normalisation	emotional_regulation
1	4	Impulse control—recognise escalation moments and refocus with a brief reset ritual (self-talk, breath, sensory cue).	Impulse control and reset routines	impulse_control
2	1	Leadership.	Strengthen leadership capacities	leadership_empathy
2	2	Spontaneity.	Increase spontaneity	spontaneity
2	3	Self-confidence.	Build self-efficacy/confidence	self_efficacy
2	4	Recovery after high loads.	Recovery routines after intensive periods	recovery_balance
3	1	Maintain and improve psychological flexibility between load and recovery; update goal programs; mindfulness, breathing, mental training, imagery, self-talk.	Prevent stagnation, balance load-recovery, strengthen flexibility	mental_flexibility
3	2	Reduce overcontrol, trust the body, allow flow; relaxation and breathing; cognitive acceptance of mistakes; biofeedback.	Decrease overcontrol/anxiety via relaxation and reframing; biofeedback	reduce_overcontrol
3	3	Strengthen self-regulation and intrinsic motivation; emotion awareness and management; self-esteem; focus on progress; ABC model; routines and attentional focus; self-efficacy.	Comprehensive self-regulation skill-building	self_regulation_package
3	4	Develop patience, sustained attention, and impulse control; perceptual slowing drills; cognitive control and decision quality under pressure; rhythm and focus training.	Impulse control and sustained attention under pressure	impulse_control
4	1	Possibly enhance team-bonding skills and empathy toward teammates.	Team cohesion and empathy	leadership_empathy
4	2	Use visualization to strengthen automatic reactions and reduce overthinking.	Imagery to automate performance, reduce rumination	visualization
4	3	Emotion regulation and stress-coping skills.	Emotion regulation competence	emotional_regulation
4	4	Impulse control and attentional endurance.	Impulse control and sustained attention	impulse_control
5	1	Imagery and relaxation, activation of inner resources, shifting attention and resting, problem-focused sessions.	Imagery/relaxation and attention shifting	visualization
5	2	Enhance self-regulation skills, goal setting, and routines.	Self-regulatory goal routines	self_regulation_package
5	3	Full toolbox on demand.	Comprehensive/individualised toolkit	broad_toolkit
5	4	Imagery, self-regulation, routines, self-talk, problem-focused sessions.	Imagery and routines with self-talk	visualization
6	1	Psychophysiological optimisation to be in best form at the right moment; possible team-cohesion interventions.	Psychophysiological readiness and team cohesion	psycho_phys_optimization
6	2	Work on personality traits (e.g., perfectionism); long-term self-regulation training.	Address perfectionism; train self-regulation	perfectionism_work
6	3	Start with psychological assessment (traits, attention, memory); risk of drop-out; progress may be slow.	Assessment-led plan for regulation and attention	assessment_first
6	4	Highly structured, short-term, athlete-ordered interventions (situational themes, post-injury, career closure).	Brief, structured, demand-led interventions	brief_structured
7	1	Maintain optimal motivation; avoid stagnation; develop creativity, flexibility, openness; goal refinement; leadership; adaptability.	Sustain motivation and develop creative flexibility and leadership	mental_flexibility
7	2	Emotional freedom, spontaneity and self-reliance; reduce anxiety and overthinking; relaxation; cognitive reframing; switch to automatic execution; strengthen self-efficacy.	Reduce anxiety/overthinking; enhance spontaneity and self-efficacy	reduce_overcontrol
7	3	Build self-regulation, emotional resilience and concentration; routines, micro-goals, positive self-talk.	Self-regulation and resilience routines	self_regulation_package
7	4	Patience, long-term focus, frustration tolerance; attention mindfulness; emotional pause techniques; endurance for controlled tasks; balance speed and accuracy.	Patience and frustration tolerance with accuracy-speed balance	frustration_tolerance
8	0	Interventions depend on sport type (team vs individual), gender, current skill level and personality.	Contextual tailoring by sport/sex/skill/traits	contextual_factors
9	1	Emotion control and concentration.	Emotion regulation and attentional control	emotional_regulation
9	2	Concentration and inner dialogue.	Focus and self-talk	self_talk_focus
9	3	Emotion control and inner dialogue.	Emotion regulation with self-talk	emotional_regulation
9	4	Visualization.	Imagery/mental rehearsal	visualization

## Sheet: Q3_Interventions_Frequency
Thematic_Code	1	2	3	4	Total_mentions
visualization	1	1	0	2	4
emotional_regulation	1	0	3	0	4
impulse_control	0	0	0	3	3
leadership_empathy	3	0	0	0	3
self_regulation_package	0	1	2	0	3
mental_flexibility	2	0	0	0	2
reduce_overcontrol	0	2	0	0	2
self_efficacy	0	0	1	0	1
unpredictability_training	0	1	0	0	1
spontaneity	0	1	0	0	1
self_talk_focus	0	1	0	0	1
self_reflection	1	0	0	0	1
assessment_first	0	0	1	0	1
relaxation_breathing	0	1	0	0	1
brief_structured	0	0	0	1	1
psycho_phys_optimization	1	0	0	0	1
perfectionism_work	0	1	0	0	1
frustration_tolerance	0	0	0	1	1
broad_toolkit	0	0	1	0	1
recovery_balance	0	0	0	1	1

## Sheet: Q3_Interventions_Summary
Profile	Top_Intervention_Themes
1	leadership_empathy (N=3); mental_flexibility (N=2); visualization (N=1); psycho_phys_optimization (N=1); emotional_regulation (N=1); self_reflection (N=1)
2	reduce_overcontrol (N=2); visualization (N=1); perfectionism_work (N=1); relaxation_breathing (N=1); spontaneity (N=1); unpredictability_training (N=1); self_talk_focus (N=1); self_regulation_package (N=1)
3	emotional_regulation (N=3); self_regulation_package (N=2); assessment_first (N=1); broad_toolkit (N=1); self_efficacy (N=1)
4	impulse_control (N=3); visualization (N=2); brief_structured (N=1); frustration_tolerance (N=1); recovery_balance (N=1)
